# Supplementary material for: An in situ coupling strategy for the preparation of heterometal-doped carbon frameworks as efficient bifunctional ORR/OER electrocatalysts
Source: Royal Society of Chemistry journal article supplement (doi:10.1039/c9nj04422a), 2019-01-01
Supplement: c9nj04422a1.pdf [file c9nj04422a1.pdf]

*Electronic supplementary information*

**In situ coupling strategy for the preparation of  
heterometal-doped carbon framework as efficient  
bifunctional ORR/OER electrocatalyst**

Hui Li<sup>a</sup>, Zhuyin Sui<sup>\*,b</sup>

*<sup>a</sup> Department of Chemistry, Key Laboratory of Bioorganic Phosphorus  
Chemistry & Chemical Biology, Beijing Key Laboratory for Analytical  
Methods and Instrumentation, Tsinghua University, Beijing 100084, China.*

*<sup>b</sup> College of Chemistry & Chemical Engineering, Yantai University, Yantai  
264005, China*

Tel: +86 535 690 2433

Email: [suizhuyin@163.com](mailto:suizhuyin@163.com)

**Section 1. SEM image**

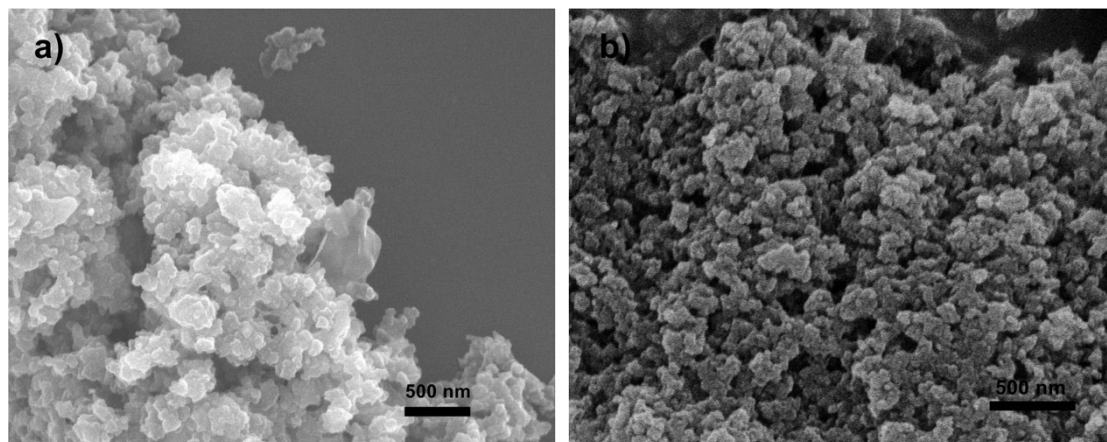

**Fig. S1** SEM images of CMP-CoFe/C.

## Section 2. FT-IR profile

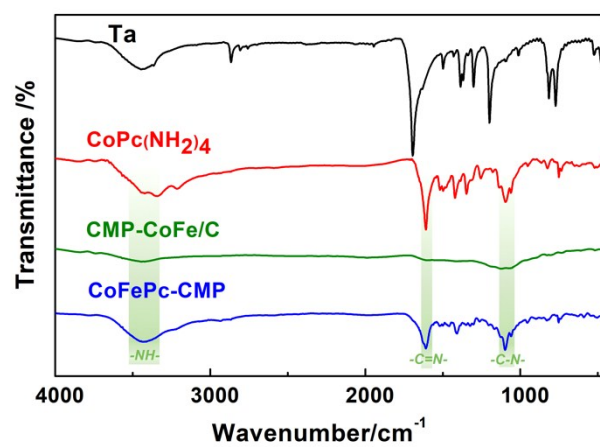

**Fig. S2** FT-IR spectra of terephthalaldehyde (TA), CoPc(NH<sub>2</sub>)<sub>4</sub>, CoFePc-CMP and CMP-CoFe/C.

### Section 3. HRTEM image

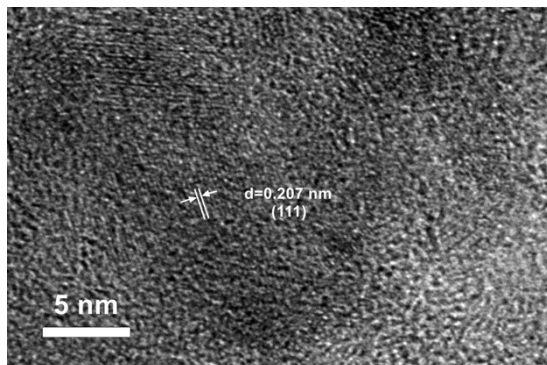

**Fig. S3** HRTEM image of Co-N<sub>x</sub> in CMP-CoFe/C.

## Section 4. Raman spectrum

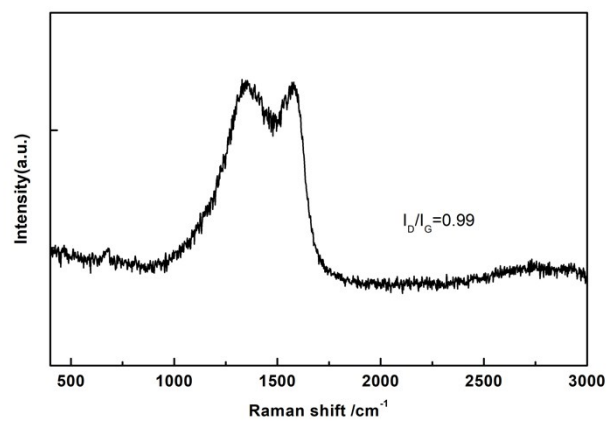

**Fig. S4** Raman spectrum of CMP-CoFe/C.

## Section 5. BET profile

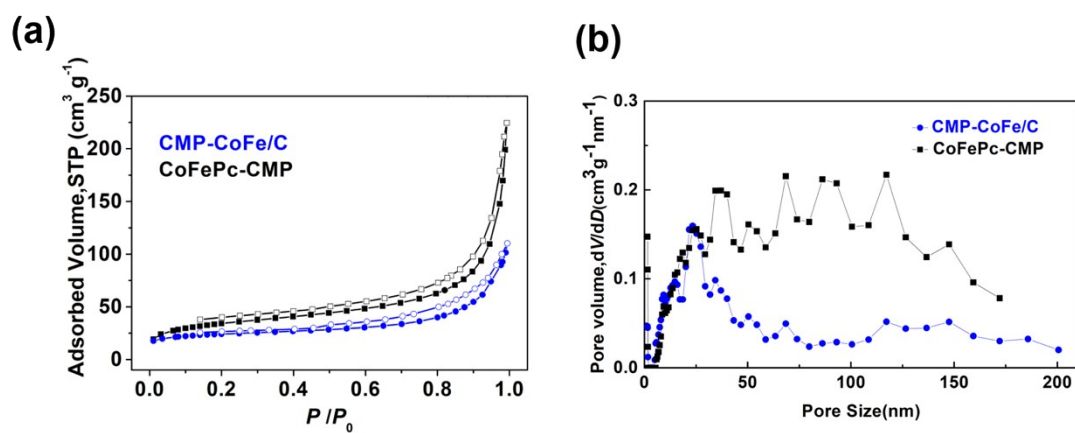

**Fig. S5** (a) Nitrogen adsorption-desorption isotherms and (b) pore size distribution of CMP-CoFe/C and CoFePc-CMP.

## Section 6. XAFS profile

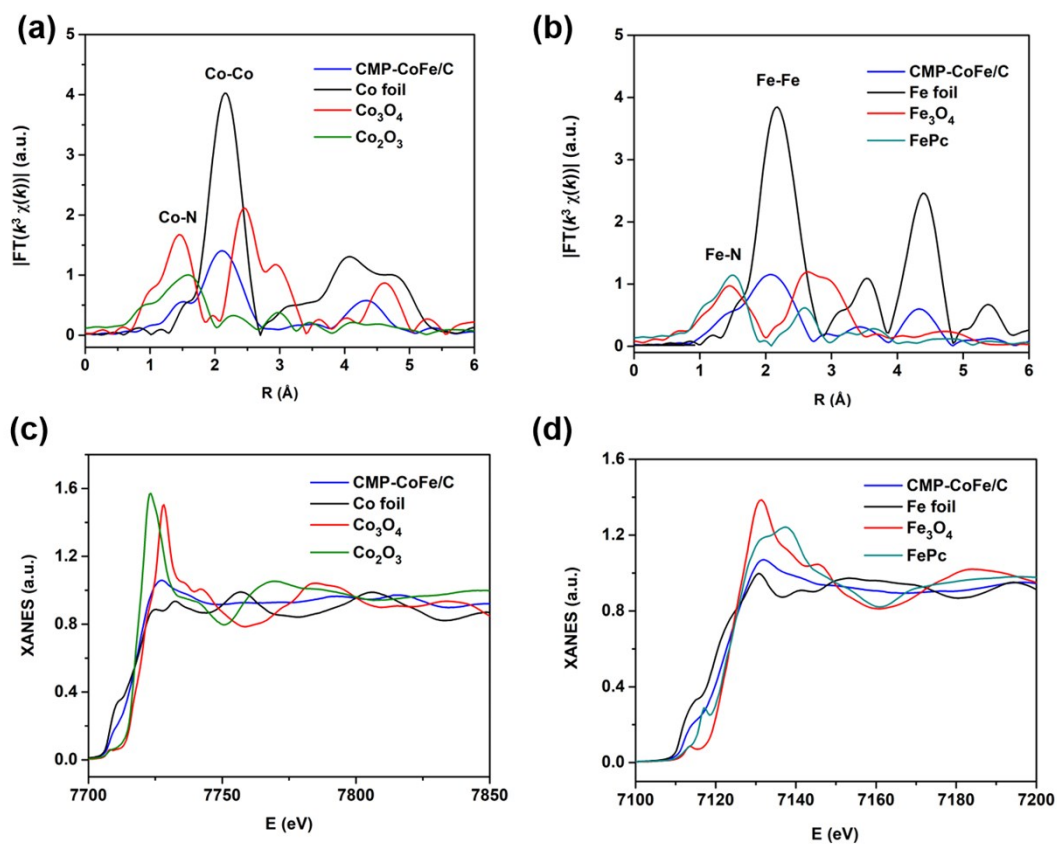

**Fig. S6** Fourier transformed  $k^3$ -weighted  $\chi(k)$ -function of the EXAFS spectra for (a) Co K-edge and (b) Fe K-edge of CMP-CoFe/C. (c) Co K-edge and (d) Fe K-edge XANES spectra of CMP-CoFe/C.

## Section 7. CV curves

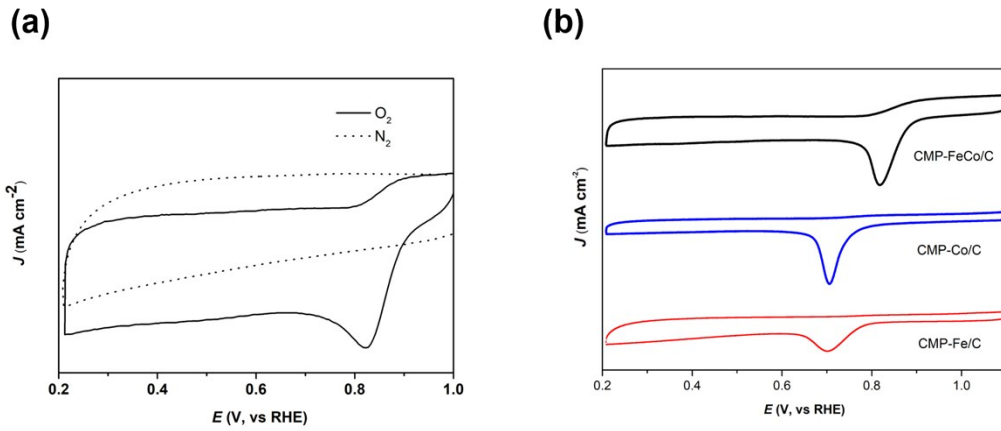

**Fig. S7** (a) CV curves of CMP-CoFe/C in N<sub>2</sub>- or O<sub>2</sub>-saturated 0.1 M KOH aqueous solution. (b) CV curves of CMP-CoFe/C, CMP-Fe/C and CMP-Co/C in O<sub>2</sub>-saturated 0.1 M KOH aqueous solution.

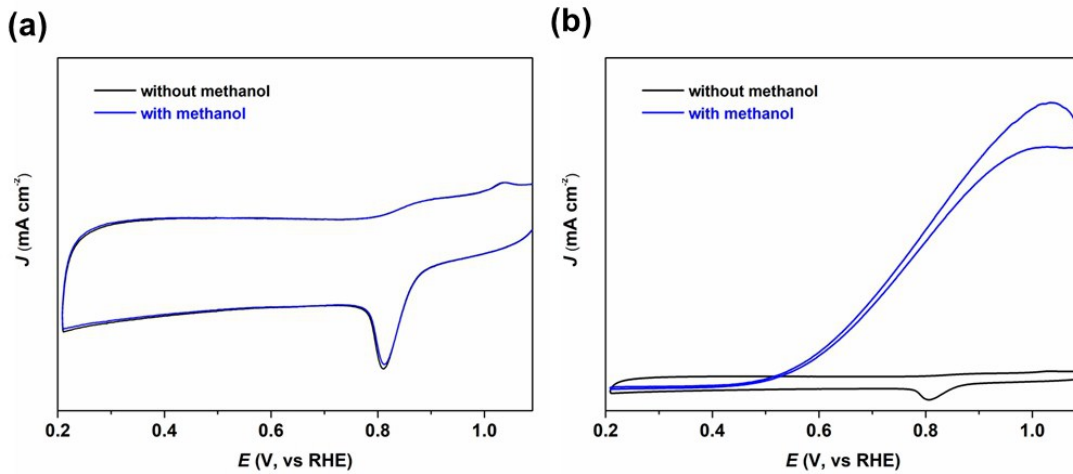

**Fig. S8** CV curves of CMP-CoFe/C (a) and 20 wt% Pt/C (b) at a scan rate of 50 mV s<sup>-1</sup> in O<sub>2</sub>-saturated 0.1 M KOH solution containing 3M methanol.



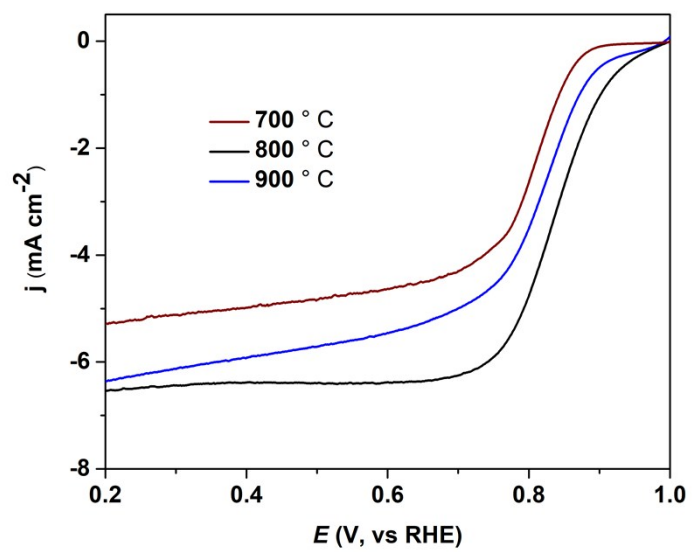

**Fig. S9** LSV polarization curves of CMP-CoFe/C obtained by pyrolyzing at 700 °C, 800 °C, and 900 °C.

## Section 8. The electrochemically active surface area (ECSA) profile

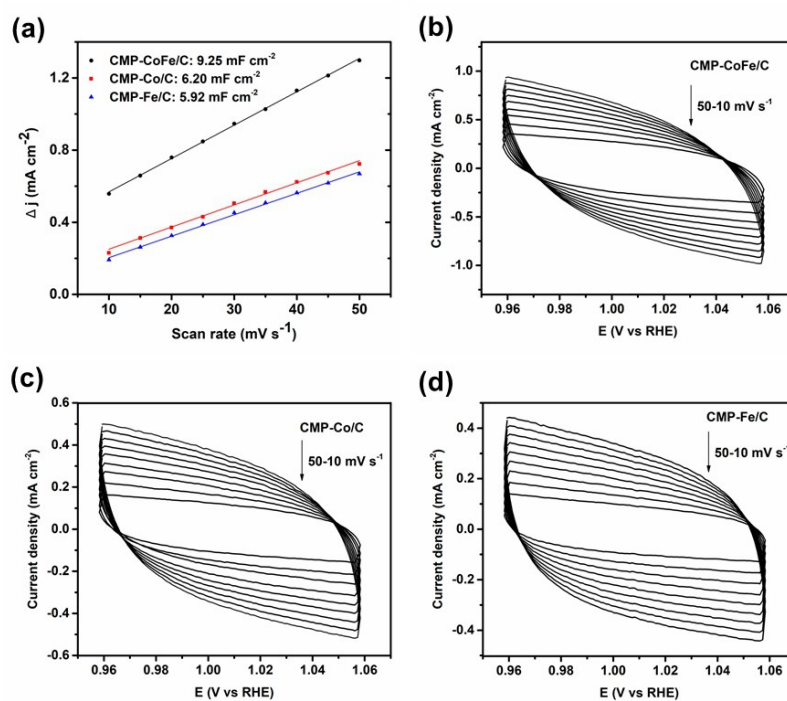

**Fig. S10** (a) The capacitive current densities (measured at 1.01 V vs. RHE) against different scan rates. CV curves of CMP-CoFe/C (b), CMP-Co/C (c), and CMP-CoFe/C (d) at different scan rates ranging from 50 to 10 mV s<sup>-1</sup> with an interval of 5 mV s<sup>-1</sup>.

## Section 9. The LSV curve

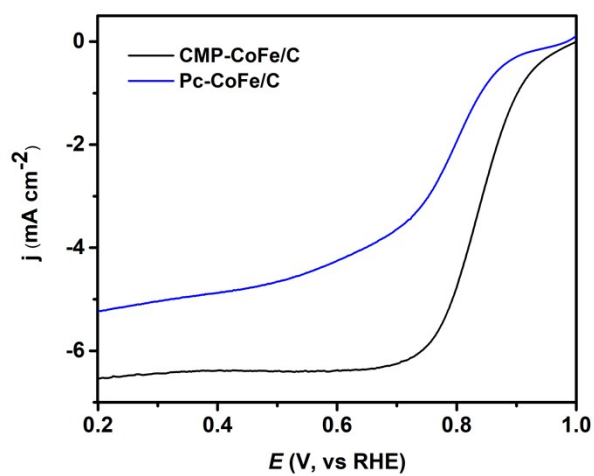

**Fig. S11** LSV curves CMP-CoFe/C and Pc-CoFe/C in O<sub>2</sub>-saturated 0.1 M KOH solution with 5 mV s<sup>-1</sup> scan rate using an RDE at 1600 rpm.

## Section 11. Summary of bifunctional performance of related materials

**Table S1** Comparison of bifunctional performance of reported catalysts and this work.

| Catalyst                                  | $E_{1/2}$ (V) | $E_{j=10}$ (V) | $\Delta E$ (V) | Refs      |
|-------------------------------------------|---------------|----------------|----------------|-----------|
| $\text{Ni}_x\text{Co}_{1-x}(\text{OH})_2$ | 0.62          | 1.56           | 0.96           | [1]       |
| $\text{NiFeO@MnO}_x(1:0.8)$               | 0.795         | 1.65           | 0.855          | [2]       |
| <b>NiO/CoN Porous NW</b>                  | 0.68          | 1.53           | 0.85           | [3]       |
| <b>Fe@N-C</b>                             | 0.84          | 1.70           | 0.86           | [4]       |
| <b>NiCo/PFC aerogels</b>                  | 0.76          | 1.62           | 0.86           | [5]       |
| <b>FeCo NPs doped carbon</b>              | 0.92          | 1.73           | 0.81           | [6]       |
| <b>Co@Co<sub>3</sub>O<sub>4</sub>/NC</b>  | 0.80          | 1.65           | 0.85           | [7]       |
| <b>Co-N<sub>x</sub>-C graphene</b>        | 0.80          | 1.75           | 0.95           | [8]       |
| <b>FeNi-COP-800</b>                       | 0.803         | 1.63           | 0.827          | [9]       |
| <b>CMP-CoFe/C</b>                         | 0.84          | 1.64           | 0.80           | This work |

## References

- [1] L. Wang, C. Lin, D. Huang, F. Zhang, M. Wang, J. Jin, *ACS Appl. Mater. Inter.* **2014**, *6*, 10172–10180.
- [2] Y. Cheng, S. Dou, J. P. Veder, S. Wang, M. Saunders, S.P. Jiang, *ACS Appl. Mater. Inter.* **2017**, *9*, 8121–8133.
- [3] J. Yin, Y. Li, F. Lv, Q. Fan, Y. Q. Zhao, Q. Zhang, W. Wang, F. Cheng, P. Xi, S. Guo, *ACS Nano* **2017**, *11*, 2275–2283

- [4] J. Wang, H. Wu, D. Gao, S. Miao, G. Wang, X. Bao, *Nano Energy* **2015**, *13*, 387–396.
- [5] G. Fu, Y. Chen, Z. Cui, Y. Li, W. Zhou, S. Xin, Y. Tang, J. B. Goodenough, *Nano Lett.* **2016**, *16*, 6516–6522.
- [6] C. Y. Su, H. Cheng, W. Li, Z.-Q. Liu, N. Li, Z. Hou, F.-Q. Bai, H.-X. Zhang, T.-Y. Ma, *Adv. Energy Mater.* **2017**, *7*, 1602420.
- [7] A. Aijaz, J. Masa, C. Rösler, W. Xia, P. Weide, A. J. R. Botz, R. A. Fischer, W. Schuhmann, M. Muhler, *Angew. Chem. Int. Ed.* **2016**, *55*, 4087–4091.
- [8] C. Tang, B. Wang, H.-F. Wang, Q. Zhang, *Adv. Mater.* **2017**, *29*, 1703185
- [9] Z. Liao, Y. Wang, Q. Wang, Y. Cheng, Z. Xiang, *Applied Catalysis B: Environmental*, **2018**, *243*, 204–211.
